## **Mechanosensory input shapes *Drosophila* motor behavior through Patterned Spontaneous Network Activity**

Arnaldo Carreira-Rosario<sup>1,2</sup>, Ryan A. York<sup>1</sup>, Minseung Choi<sup>1</sup>, Chris Q. Doe<sup>2\*</sup>, and Thomas R. Clandinin<sup>1\*</sup>

<sup>1</sup>Department of Neurobiology, Stanford University, Stanford, CA 94305

<sup>2</sup>Institute of Neuroscience, Howard Hughes Medical Institute, University of Oregon, Eugene, OR 97403

\* Authors for correspondence at [trc@stanford.edu](mailto:trc@stanford.edu) or [cdoe@uoregon.edu](mailto:cdoe@uoregon.edu)

Keywords: nervous system development; development of locomotor behavior;  
*Drosophila* embryo

### Highlights

- PaSNA in the *Drosophila* embryonic CNS is spatiotemporally stereotyped
- Mechanosensory neurons negatively modulate PaSNA
- Embryonic PaSNA is required for larval locomotor behavior

## Summary

Neural activity sculpts circuit wiring in many animals. In vertebrates, patterned spontaneous network activity (PaSNA) generates sensory maps and establishes local circuits<sup>1-3</sup>. However, it remains unclear how PaSNA might shape neuronal circuits and behavior in invertebrates. Previous work in the developing *Drosophila* embryo discovered spontaneous muscle activity that did not require synaptic transmission, and hence was myogenic, preceding PaSNA<sup>4-6</sup>. These studies, however, monitored muscle movement, not neural activity, and were therefore unable to observe how myogenic activity might relate to subsequent neural network engagement. Here we use calcium imaging to directly record neural activity and characterize the emergence of PaSNA. We demonstrate that the spatiotemporal properties of PaSNA are highly stereotyped across embryos, arguing for genetic programming. Consistent with previous observations, we observe neural activity well before it becomes patterned, initially emerging during the myogenic stage. Remarkably, inhibition of mechanosensory input results in excessive PaSNA, demonstrating that muscle movement serves as a brake. Finally, using an optogenetic strategy to selectively disrupt mechanosensory inputs during PaSNA, followed by quantitative modeling of larval behavior, we demonstrate that mechanosensory modulation during development is required for proper larval foraging. This work thus provides a foundation for using the *Drosophila* embryo to study the role of PaSNA in circuit formation, provides mechanistic insight into how PaSNA is entrained by motor activity, and demonstrates that spontaneous network activity is essential for locomotor behavior. These studies argue that sensory feedback during the earliest stages of circuit formation can sculpt locomotor behaviors through innate motor learning.

## Results

### PaSNA in the *Drosophila* embryo

Motor movements begin in the embryo as uncoordinated twitching at stage 16, followed by larger scale movements that progressively become stronger and more organized prior to hatching approximately 5 hours later (Figure 1A). To characterize the emergence of neural activity across these stages, as well as to make comparisons between animals, and to facilitate rapid screening of neural and

molecular perturbations, we developed a wide-field imaging preparation in which we could monitor neural activity in 20-30 embryos simultaneously (Figure 1B; Methods). We expressed the genetically encoded calcium indicator GCaMP6s in all neurons, while co-expressing nuclear tdTomato to allow for ratiometric imaging, and acquired images every 7 seconds from the myogenic stage through hatching (Video S1A, B). Under these imaging conditions, 95% of control animals hatched ( $n = 60$ ), demonstrating that this preparation does not disrupt normal development. Finally, to correct for small variations in the developmental timing of individual embryos, we monitored ventral nerve cord (VNC) condensation and normalized developmental stage by computing the ratio of the length of the embryo to the length of the central nervous system (CNS) (Figure S1A), following standard methods <sup>7,8</sup>.

Consistent with the observable pattern of muscle movements <sup>5</sup>, we observed episodes in which intracellular calcium concentrations increased in many neurons and their processes (Figure 1C, D; Video S1). Strikingly, the timing of the first large wave of neural activity was highly consistent from animal to animal, appearing at a length ratio of 2.2 (95%CI [0.06, 0.06]) (Figure S1B), corresponding to early stage 17. Aligning calcium traces by the timing of the first episode revealed that the overall PaSNA pattern was qualitatively and quantitatively similar across all embryos (Figure 1D-F). In particular, a total of 17 PaSNA episodes (95%CI [0.99, 0.99]) that occurred over 275 minutes (95%CI [18.3, 18.3]) preceded hatching (Figure S1B, C). Moreover, size and duration of each wave of activity consistently increased over the first eight waves, before stabilizing (Figure 1E). Finally, in parallel with the increasing strength of the early episodes, the interbout interval dramatically decreased over the first five episodes of PaSNA from 21.8 minutes (95% CI [2.3,2.5]) to 13.3 minutes (95% CI [1.1,1.2]) (Figure 1 F). Taken together, these data show that PaSNA is highly stereotyped from embryo to embryo, suggesting that PaSNA is genetically encoded.

## Spatiotemporal properties of the initial PaSNA episode

We focused next on the first episode of PaSNA, a period of particular interest given that it represents the transition from myogenic to neurogenic movement. To what extent is the pattern of neural activity underlying the first episode stereotyped across embryos? To investigate the spatiotemporal patterns of neural activity during single episodes of PaSNA, we developed a two-photon (2P) microscopy preparation to image embryos expressing pan-neuronal GCaMP6s and tdTomato. This system allows for imaging of the entire VNC for two hours at cellular resolution, acquiring imaging volumes at 2.6 Hz. Embryos survive imaging, hatch and become adult flies ( $n = 8$ ). To unequivocally identify the first episode of PaSNA, we began imaging at least 30 minutes before the neurogenic phase. Preceding the first episode of PaSNA, we observed sporadic neuronal firing throughout the VNC, an activity pattern we refer to as flickering. This activity was observed more than 30 minutes before the first PaSNA episode, thus appearing during the myogenic phase of movement<sup>5</sup>. After this, the first PaSNA episode began, and comprised three phases, namely *localized initiation*, *propagation* and *peak activity* (Figure 2A; Video S2). During the first phase, we observed increased levels of neural activity within a stereotyped region, marking the *localized initiation* of PaSNA and defining the start of neurogenic activity. During the second phase, we observed a single wave of neural activity that traversed the VNC and defined *propagation*. During the third phase, we observed a period of *peak activity* along the VNC that persisted for approximately 80 seconds. Activity then returned to basal levels where a flickering-like interbout interval persisted until the next episode.

The focal activity observed during the *localized initiation* phase prompted us to examine whether the location of this event was invariant across embryos. Analysis of neural activity within ROIs along the anterior-posterior (A-P) axis of the VNC showed that PaSNA always initiated in the anterior region of the VNC (Figure 2C) ( $n = 8$ ). Furthermore, in 100% of the embryos, activity initiated in one of the two most anterior ROIs, a region spanning the thoracic segments. After initiation, activity always propagated bidirectionally along the A-P axis. Strikingly, the wave of neural activity

propagated slowly, reaching the most posterior region of the embryo approximately 75 seconds after localized initiation, corresponding to a speed of less than 2  $\mu\text{m}$  per second. Lastly, in all embryos, the more posterior regions were the last to return to basal, flickering activity. Together, these observations demonstrate that the initial episode of PaSNA is highly stereotyped in embryos.

### **The role of neural activity in initiating PaSNA**

Next, we examined the role of neural activity in the initiation of PaSNA. To test whether neuronal depolarization caused the observed calcium transients recorded with GCaMP, we inhibited depolarization in all neurons through pan-neuronal expression of the inward-rectifier potassium channel Kir<sub>2.1</sub><sup>9</sup>. As expected, this abolished flickering during the myogenic phase, as well as all three phases of PaSNA, indicating that PaSNA is a voltage-dependent process (Figure 2E; Video S3). Next, we tested whether PaSNA is driven by chemical synapses by inhibiting synaptic transmission using tetanus toxin (TNT)<sup>9</sup>. Pan-neuronal expression of TNT had no effect on flickering during the myogenic phase, but prevented all three phases of PaSNA (Figure 2F; Video S4). This demonstrates that flickering emerges in the absence of synaptic transmission, and thus is likely due to the intrinsic membrane excitability of individual neurons. Together, these results show that while neuronal depolarization and chemical synaptic transmission are both crucial for PaSNA, only depolarization is required for flickering.

### **Mechanosensory input negatively modulates PaSNA**

We next sought to determine whether the initial, myogenic phase of spontaneous muscle movement might be functionally coupled to the initiation of PaSNA. We reasoned that this coupling could occur through sensory feedback. Therefore, we first asked which sensory neurons are active during the myogenic phase. We used the calcium integrator system CaLexA, a method for transcriptionally labeling active neurons (Figure 3A)<sup>10</sup>. To restrict this system to only those neurons that are active in the absence of synaptic transmission, we used pan-neuronal expression of TNT (Figure 2F; Figure 3A). Thus, the CaLexA reporter can only be induced in neurons

that are active during the myogenic phase, allowing selective labeling of single cells revealing their identity (Figure 3A). Strikingly, every embryo displayed high levels of CaLexA expression in mechanosensory chordotonal (mechano-ch) neurons (Figure 3B-E).

Mechano-ch neurons detect muscle stretch, relaying both proprioceptive signals and external mechanosensory stimuli<sup>11</sup>, making them ideal candidates for coupling muscle movements to PaSNA. To test this idea, we silenced mechano-ch neurons and examined whether this perturbation altered the timing or intensity of the initial episodes of PaSNA. To do this, we used the *inactive* (*iav*) enhancer to express the inward rectifying channel Kir<sub>2.1</sub> in mechano-ch neurons, and monitored neural activity during the first two PaSNA episodes using wide-field imaging of pan-neuronally expressed GCaMP6s. Consistent with previous work demonstrating that blocking all sensory neuron function did not prevent the emergence of muscle movements<sup>5</sup>, the onset of PaSNA was unaffected by silencing mechano-ch neurons (Figure S2A). Strikingly, however, the amplitude of the first two episodes of PaSNA was increased in these embryos as compared to controls (Figure 3F-H, S3C). Together, these results suggest that mechano-ch activity during the myogenic phase normally acts to negatively modulate the amplitude of PaSNA.

### **Developmental inhibition of mechanosensory input leads to abnormal larval behavior**

Our observation that silencing mechano-ch sensory neurons increased PaSNA raised the question of whether this change in PaSNA had behavioral consequences, and more specifically, whether these transient changes in PaSNA resulted in long-term behavioral deficits. We inhibited mechano-ch activity transiently (from the late myogenic phase through to the end of PaSNA) by using the *iav* enhancer to express the *G. theta* anion channelrhodopsin 1 (GtACR1)<sup>12</sup>, and examined larval behavior 24hrs after hatching using the Frustrated Total Internal Reflection-based imaging method (FIM; Figure 4A)<sup>13</sup>. We employed Time REsolved Behavioral Embedding (TREBLE) to characterize potential behavioral differences between the

optogenetically silenced condition and the control. TREBLE is a quantitative framework for identifying structure in behavior by collecting features (such as larval posture or velocity) into temporal windows and embedding these into a low-dimensional space (Figure 4B). As previously shown<sup>14</sup>, we found that the major components of the larval foraging ethogram<sup>15,16</sup> can be captured in a 2-dimensional space using TREBLE (Figure 4B, C). In this 2-dimensional space, crawling is represented by an oscillator with directional movement (Figure S3) and is connected to regions corresponding to pausing and turning (Figure 4C).

In the TREBLE approach, both control and transiently inhibited larvae were used to generate a single, common behavior space ( $n = 181$  (84 control larvae, 97 transiently inhibited larvae); 179,409 windows; Methods) behavioral variation could be directly inferred via differences in the likelihood of either condition occupying specific regions (Figures 4D-E). Control and inhibited conditions displayed notably different occurrence distributions (Figures 4D-E), the biggest deviations of which were restricted to specific regions of behavior space (Figure 4F). Control larvae were more likely to visit parts of the behavior space that correspond to pauses and bends (Figure 4F; Figure S3) while inhibited larvae spent more time, proportionally, in the crawling oscillator (Figure 4F). To confirm these differences using a TREBLE independent approach, we compared the primary behavioral features themselves, as measured using the FIM system, and observed that inhibited larvae bend less, crawl further, and have a significantly increased velocity distribution relative to control animals (Figure 4G; trial-wise Kruskal-Wallis test, Bonferroni correction).

Finally, to quantitatively compare control and transiently inhibited larvae in the TREBLE space, we clustered the behavior space based on similarity to identify discrete elements of behavior that together represent foraging (Methods). We then examined whether control and transiently inhibited larvae display changes in the frequency of occurrence of discrete behavioral motifs (Figure 4H). Reflecting our previous findings, the mechano-ch silenced and control animals displayed different overall distributions (Figure 4I) and significantly varied across a number of behavioral motifs (Figure 4J; trial-

wise Kruskal-Wallis test). Specifically, controls were more likely to pause (Figure 4J; dark blue cluster;  $p = 0.0099$ ) and head cast during crawling (Figure 4J; dark orange cluster;  $p = 0.0012$ ) while the mechano-ch silenced larvae were more likely to be crawling (Figure 4J; red, orange, light green clusters). These findings demonstrate that developmental inhibition of mechano-ch neurons leads to an apparent simplification of larval foraging behavior, biasing animals toward ongoing crawling as opposed to the typical sequence of crawling, pausing, and head casting. Together, these results demonstrate that transient inhibition of mechano-ch during PaSNA causes deficits in larval behavior.

## Discussion

These studies demonstrate that PaSNA in the *Drosophila* embryo follows a stereotyped sequence of wave-like, large-scale network activation events interspersed by low-activity periods (Figure 1, 2). Strikingly, our data also demonstrate that mechanosensory inputs shape the magnitude of PaSNA, likely beginning during the myogenic phase but perhaps also continuing throughout each subsequent wave (Figure 3). Transiently disrupting this mechanosensory feedback during embryonic development results in deficits in larval locomotor behavior, arguing that neural activity plays a critical role in the functional organization of locomotor circuits (Figure 4). These results suggest that sensory inputs generated by spontaneous muscle contraction play a role in subsequent circuit establishment, thereby providing one of the earliest examples of sensory regulation of locomotor development in any context.

Our work has measured the trajectory of neural activity across the embryonic development. Prior to PaSNA, individual CNS neurons display transient elevations in intracellular calcium levels (flickering) that depend on depolarization of the plasma membrane, but which are independent of synaptic input. We hypothesize that these cells are spontaneously excitable. In addition, as previous work has demonstrated, muscle twitching independent of neural activity also occurs, and based on our work, appears to lead to activation of mechano-ch sensory neurons. The output of



mechano-ch neurons then acts to negatively modulate the amplitude of the initial PaSNA waves.

Our data demonstrate that the first episode of PaSNA invariably begins in the thoracic region (Figure 2). After this initial event, PaSNA proceeds through a stereotyped sequence of accelerating, intensifying waves through to hatching. Given the striking similarity in both the spatial and temporal properties of PaSNA in the embryo, as well as analogous observations in the *Drosophila* visual system<sup>17</sup>, we hypothesize that this process is under tight genetic control. Intriguingly, our observations parallel previous results in the developing chick spinal cord, where waves of activity are also preceded by sporadic activity and PaSNA initiates in a localized region at the anterior part of the spinal cord<sup>18</sup>. We speculate that evolutionarily ancient mechanisms initiate PaSNA in motor systems in both invertebrates and vertebrates. Our characterization of the initiation and progression of PaSNA in the *Drosophila* embryo sets the stage for the dissection of these mechanisms at the level of specific circuits, cells, and molecules.

Our quantitative measurements of PaSNA put constraints on the molecular basis of its implementation. In particular, the speed with which a single wave of activity traverses the nervous system is remarkably slow, taking approximately 75 seconds to move from the initiation zone to the most posterior region of the VNC. By comparison, the wave of neural activity needed to produce a wave of crawling takes approximately one second to travel the same distance<sup>19,20</sup>. We infer that wave propagation during embryogenesis is unlikely to proceed by a simple neuron-to-neuron sequence of synaptic transmission events along a circuit. Understanding the cellular and molecular basis of this wave propagation mechanism represents an important challenge for future work.

Relatively little attention has been paid to examining the role of spontaneous neural activity in shaping innate behaviors. In that light, our finding that the activity of mechano-ch neurons during development shapes locomotor behavior is remarkable. Given that this behavioral effect is developmentally programmed, we hypothesize that mechano-ch

input is needed to pattern connectivity or determinant the physiological properties of specific cells in developing motor circuits. Indeed, blocking synaptic transmission in mechano-ch neurons throughout development changes the connectivity of these cells with their post-synaptic partners, cells that mediate behavioral responses to vibration<sup>21</sup>. We hypothesize that the changes that mechano-ch inputs exert on developing circuits are, in fact, widespread, modifying circuits across the CNS through PaSNA. Supporting this idea, the locomotor phenotype of inhibiting mechano-ch neurons after PaSNA is very different from our targeted developmental inhibition of the same neurons<sup>22–24</sup>. In vertebrates, motor feedback is crucial to shaping learned motor behaviors through activity-dependent mechanisms<sup>25</sup>. It is tempting to speculate that the sculpting of innate foraging behavior by mechano-ch neuron activity in *Drosophila* reveals an analogous, evolutionarily ancient mechanism that may have been co-opted in other contexts to enable motor learning.

## Materials and Methods

### Fly Stocks

All stocks were kept at 25°C on molasses-based food. The following stocks were used: UAS-IVS-Syn21-GCaMP6s-P2A-nls-tdTomato-p10 on JK66B was a gift from Marta Zlatic (MRC Laboratory of Molecular Biology). LexAop- Kir<sub>2.1</sub> at VIE-260B and UAS- Kir<sub>2.1</sub> at VIE-260B were gifts from Barry Dickson (The University of Queensland). UAS-GtACR1 at attP2 was a gift from A. Claridge-Chang (Duke-NUS Med School). The following stocks were obtained from the Bloomington Drosophila Stock Center: elav-GAL4.L on 3rd (BDSC# 8760), elav-GAL4.L on 2nd (BDSC# 8765), elav<sup>c155</sup>-GAL4 (BDSC# 458), UAS-TeTxLC.tnt G2 (BDSC# 28838), UAS-mLexA-VP16-NFAT, LexAop-rCD2-GFP (CaLexA) (BDSC# 66542), LexAop-CD8-GFP-2A-CD8-GFP on 2nd (BDSC# 66545), iav-lexA::p65<sup>26</sup> on VK00013 (BDSC# 52246), attP-9A VK00013 (BDSC# 9732) and iav-GAL4.K on 3rd (BDSC# 52273).

### Embryo collection for calcium imaging

For all imaging experiments, embryos were collected in 15-30 minute time windows the day before imaging, and grown at 25°C or 23°C on standard 3.0% agar molasses

collection caps covered with a thin layer of wet yeast. Before imaging, embryos were dechorionated with double-sided tape and staged using elongation of the anterior midgut as a guide<sup>4,7</sup>. To prevent dehydration, embryos were transferred into Halocarbon oil or saline no more than 10 minutes after dechorionation.

### Wide-field imaging

Staged, dechorionated embryos were mounted ventral side up on double-sided tape, covered with Halocarbon oil (180 cSt) and imaged using a Leica M205 FA system with a Plan Apo Corr. 2X objective. For experiments shown in Figure 3 D-F, embryos were mounted on Sylgard covered with an oxygenated saline solution (103 mM NaCl, 3 mM KCl, 5 mM TES, 1 mM NaH<sub>2</sub>PO<sub>4</sub>, 4 mM MgCl<sub>2</sub>, 1.5 mM CaCl<sub>2</sub>, 10 mM trehalose, 10 mM glucose, 7 mM sucrose, and 26 mM NaHCO<sub>3</sub>). Stereoscopic magnification was used to achieve a final magnification of 64X (Figure 1) and 80X (Figure 3 D-F,). Fluorescent signals were acquired using LED illumination (CooLED pE-300 white). GCaMP6s was excited and collected using an ET470/40x ET525/50m band-pass filter set, while tdTomato was excited and collected using an ET545/25x ET605/70m band-pass filter set, acquiring each signal sequentially. Each cycle of imaging acquisition was 7 seconds long. We used a back-thinned sCMOS camera (Orca-Fusion BT - Hamamatsu) to capture images at a 1024 x 1024 resolution (after 2x2 binning), corresponding to a pixel size of 2.0 μm x 2.0 μm (Figure 1); and 512 x 512 resolution (after 4x4 binning), corresponding to a pixel size of 3.3 μm x 2.3 μm (Figure 3 D-F). Imaging sessions were from 2 hrs to 9 hrs in duration, depending on the experiment, and were conducted at 23±3°C.

### Two-photon imaging

Staged, dechorionated embryos were mounted ventral side up on Sylgard pads and imaged using a Bruker Ultima system. We used a Leica 20X HCX APO 1.0 NA water immersion objective lens, a piezo objective mount, resonant scanning and GaAsP PMTs. GCaMP6s and tdTomato signals were excited with a Chameleon Vision II laser (Coherent) at 920nm, and collected through a 525/50nm or a 595/50nm filter, respectively. Both signals were simultaneously collected using resonant scanning mode. Imaging volumes were acquired at an XY resolution of 358 x 148 (corresponding to a

pixel size of 1.05  $\mu\text{m}$  x 1.05  $\mu\text{m}$ ), with 41 z-sections separated by 1.5 $\mu\text{m}$  steps, at a volume rate of 2.6Hz. During the entire imaging session embryos were submerged in an oxygenated saline solution (as above), and kept at 25C°.

### Immunostaining and confocal imaging

Immunostaining was performed as previously described<sup>27</sup>. The 1° antibody used was chicken anti-GFP (1:2,000, Abcam). The 2° antibody used was anti-chicken Alexa 488 (1:500, Life Technologies). Confocal image stacks were acquired on a Leica SP8, using 40X HC PL APO 40X 1.3NA oil objective and a HyD detector. Images were processed in Fiji (<https://imagej.net/Fiji>). Adjustments to brightness and contrast were applied uniformly to the entire image.

### Behavior data collection

Parents were crossed and fed with wet yeast containing 0.5 mM all *trans*-Retinal (ATR) at least three days before embryo collection. ATR and yeast were replaced every day. Embryos were collected for 30 minutes on standard 3.0% agar molasses collection caps covered with a thin layer of wet yeast without ATR and incubated at 25°C in darkness. 15.5 hours later, embryos were placed under a 3.8uW/mm<sup>2</sup> 550nm LED for 5 hours. Light pulses 600ms long were delivered at one second intervals. Control animals were kept in the same incubator, in darkness. One day after light exposure was terminated, at the L1 stage, animals were collected and transferred to a Petri dish with 1.0% agar and relocated to a room kept at 23°C and 60% humidity. After 10 minutes of acclimation to the room, groups of 8 to 12 larvae were transferred to a 7.5 x 7.5 cm 1.0% agar arena. After 15 to 30 seconds, locomotion was recorded using a FIM imaging system (<sup>13</sup> <https://www.uni-muenster.de>) at 10 fps for 5 minutes. The FIM system was equipped with an azA2040-25gm camera (Basler) and a TEC-V7X macro zoom lens (Computar). Individual larvae were then tracked using FIMtrack software<sup>13,28</sup>. Primary measurements from FIMtrack were used for behavioral analyses (see below).

## **Quantitative and statistical analysis**

### Processing of calcium imaging data

After image acquisition, regions of interest (ROIs) were manually drawn on the ventral nerve cords and mean intensities were extracted using LAS X software (Leica Microsystems). For Figure 2 ROIs were drawn on Fiji (<https://imagej.net/Fiji>). To account for movement of the embryo and changes in gene expression over time, we encoded and recorded a structural fluorescent marker (tdTomato) in conjunction with the calcium sensor (GCaMP6s) and considered the ratio of the latter to the former as our measurement of calcium levels in the embryo. This ratiometric calcium signal was then converted into  $\Delta F/F$  signal, dependent on a baseline signal computed separately for each embryo. For figures 2 and 3, the initial baseline for  $\Delta F/F$  prior to peak detection was determined by calculating the mean of the 100 values lowest ratiometric values. For figure 1, the baseline for each time point in the ratiometric calcium signal was computed as a function of 16 minutes of the signal flanking the time point of interest (8 minutes prior to and 8 minutes after the time point). The 16-minute signal was divided into 20 bins of signal amplitude ranges. The bin with the largest number of samples was taken to primarily reflect the baseline, while other bins were taken to reflect deviations from the baseline. The choice of 20 bins was made empirically based on the sparsity of neuronal activity. The mean of the samples in the largest bin was considered the baseline value for the time point in the middle. At the two edges of the signal, where the full 8 minutes prior to or after the considered time point do not exist, linear fits were used as the baseline. A 150-second, quartic Savitzky–Golay filter was applied to the resulting  $\Delta F/F$  signal.

### Episode and peak detection

For figures 2 and 3, a 150-second, cubic Savitzky–Golay filter was first applied to the initial  $\Delta F/F$  trace. Standard deviation for the filtered data was then calculated.

Candidate first episodes were detected by finding the first instance where the filtered signal is equal to or higher than 1.2 times the standard deviation. Given that the intervals between episodes are at least 25 minutes, the large increase in signal must appear after a minimum of 30 minutes in order to be considered as a bona fide first

episode. These candidate episodes were then manually curated for miss-called episodes due to small fluctuations that resulted in rapid increase in signal but were not sustained over longer than 20 seconds. The second episode in figure 3 was detected in the same way once the first episode was identified. Traces were then trimmed from -245 to 800 seconds (time series plots) or -35 to 350 seconds (peak and area under the curve (AUC) quantification) relative to the initiation of the episode. These traces were used to calculate a new  $\Delta F/F$  with a new baseline that was calculated as the mean of the 25 timepoints with the lowest signal. These traces were then used to plot using Seaborn library (<https://seaborn.pydata.org/>), detect peaks using detecta peaks library (<https://pypi.org/project/detecta/>) or AUC between 50 and 180 seconds after the initiation of a peak computed using the trapezoidal rule. The N used for trace plotting in Figure 3F, G is slightly lower than quantifications in Figure 3H and Figure S3C for two of the groups, since not all traces obtained were the appropriate length for plotting. All samples quantified for area under the curve and peak are included in the traces.

For figure 1 where episodes throughout PaSNA were monitored, peaks in the  $\Delta F/F$  signal were detected using thresholds in the zeroth, first, and second derivatives of the signal. Each derivative signal was filtered with a 150-second, quartic Savitzky-Glay filter. The first derivative threshold was used to detect a rapid rise, while the second derivative was used to detect concavity. First, values crossing the zeroth derivative threshold were identified as peak candidates. A minimum peak distance of 500 seconds was enforced, following a greedy heuristic that kept candidates with the largest values first. Previous manually analyzed data showed that there is at least a 600 seconds interval between episodes. Then, of the remaining candidates, only those preceded by threshold crossings in both the first derivative and the second derivative within 210 seconds were kept and detected as episodes. Minimum thresholds of 0.06 for zeroth derivative and 0.006 for the first derivative were derived empirically, while the maximum threshold of 0 for the second derivative was chosen to select for concavity.

## Behavioral analysis

Primary measurements from FIMtrack<sup>29</sup> reflecting larval size, shape, and velocity were used for input, in addition to the angular velocity of the head, midpoint, and tail. Size measurements (i.e. area, perimeter, radii, spine length) were detrended using the `ma` function in the R package `forecast` (window size = 10) and converted to z-scores. Principal component analysis was used to control for potentially redundant information in the input features, yielding 8 principal components that explained >90% of the variance in the feature set. To find the appropriate timescale with which to analyze the behavioral features an empirical window search procedure was used (described in<sup>14</sup>). We constructed behavior spaces using the top 8 PCs sweeping window sizes ranging between 100 ms and 5 seconds. For a given window size (denoted  $w$ ), the windows were compiled as follows: given frame  $i$ , the 8 PCs corresponding to frames  $i:i+w$  were linearized and concatenated, resulting in a vector with length  $8w$ . This was repeated  $s$  frames for the length of the trial and the resulting vectors were appended to produce a window matrix with  $3w$  rows and  $t/s$  columns. A behavior space was then constructed by embedding this matrix into low-dimensional space via the UMAP algorithm<sup>30</sup>. The appropriate window size was then determined by comparing the structural (Procrustes and Euclidean distance) and temporal features (recurrence) of behavior spaces produced from 20 random trials per window size. As was found before<sup>14</sup>, a window size of 800ms was chosen.

We then created a behavior space encompassing the full control and transient inhibition datasets using this window size. Trials were first filtered to include those that were longer than 2.5 seconds and that traveled at least 50mm, resulting in 84 control and 97 transient inhibition trials and a total of 179,417 frames. The resulting behavior space captured the major components of the larval foraging ethogram (Figures 4B-C). Differences in behavior patterns between the conditions were inferred using 2-dimensional kernel density estimation (as in Figures 4B-C) computed over all trials for each condition. The difference map in Figure 4F was produced by first normalizing via division by the greatest value (to produce a range of values between 0 and 1) and then subtracting the transient inhibition map from the control map. Differences in individual feature distributions (as in Figure 4G) were assessed using a Kruskal-Wallis test

comparing the mean value for each trial across conditions (for each test  $n = 84$  control and  $n = 97$  for inhibited).

Louvain clustering was used to identify discrete components of behavior space. First, a graph was created with 2 sets of edges: the first representing the xy-coordinates in behavior space for each frame and the second corresponding to the xy-coordinates of the immediately following frame. This graph provides both information about the local neighborhood densities of the points in behavior space and the temporal sequencing between points over time. Louvain clustering was then run on this graph using the function `cluster_louvain` in the R package `igraph`<sup>31</sup>. Differences in occurrence in each cluster between the conditions were assessed using a Kruskal-Wallis test, again comparing the occurrence density of all individual trials between the two conditions ( $n = 84$  control and  $n = 97$  for inhibited).

### Statistical analysis

Statistical tests for Figure 3 and Figure S2 were conducted using unpaired-student's t-test performed with Graphpad Prism software.

### **Acknowledgements**

We thank D. Berfin Azizoglu for comments on the manuscript. Stocks obtained from the Bloomington Drosophila Stock Center (NIH P40OD018537) were used in this study. Funding was provided by HHMI (CQD, AC-R), NIH HD27056 (CQD), F32NS105350-01A1, The Walter V. and Idun Berry Postdoctoral Fellowship, K99NS119295-01 (AC-R), the Stanford School of Medicine Dean's Fellowship (RAY), and the National Defense Science & Engineering Graduate Fellowship, Stanford Graduate Fellowship, and Stanford Mind, Brain, Computation and Technology Training Program (MC).

### **Author contributions**

Conceptualization, AC-R, CQD and TRC; Methodology: AC-R; Software, AC-R, RAY and MC; Formal analysis, AC-R, RAY and MC; Investigation, AC-R; Writing, AC-R, CQD and TRC; Visualization, AC-R, RAY and MC



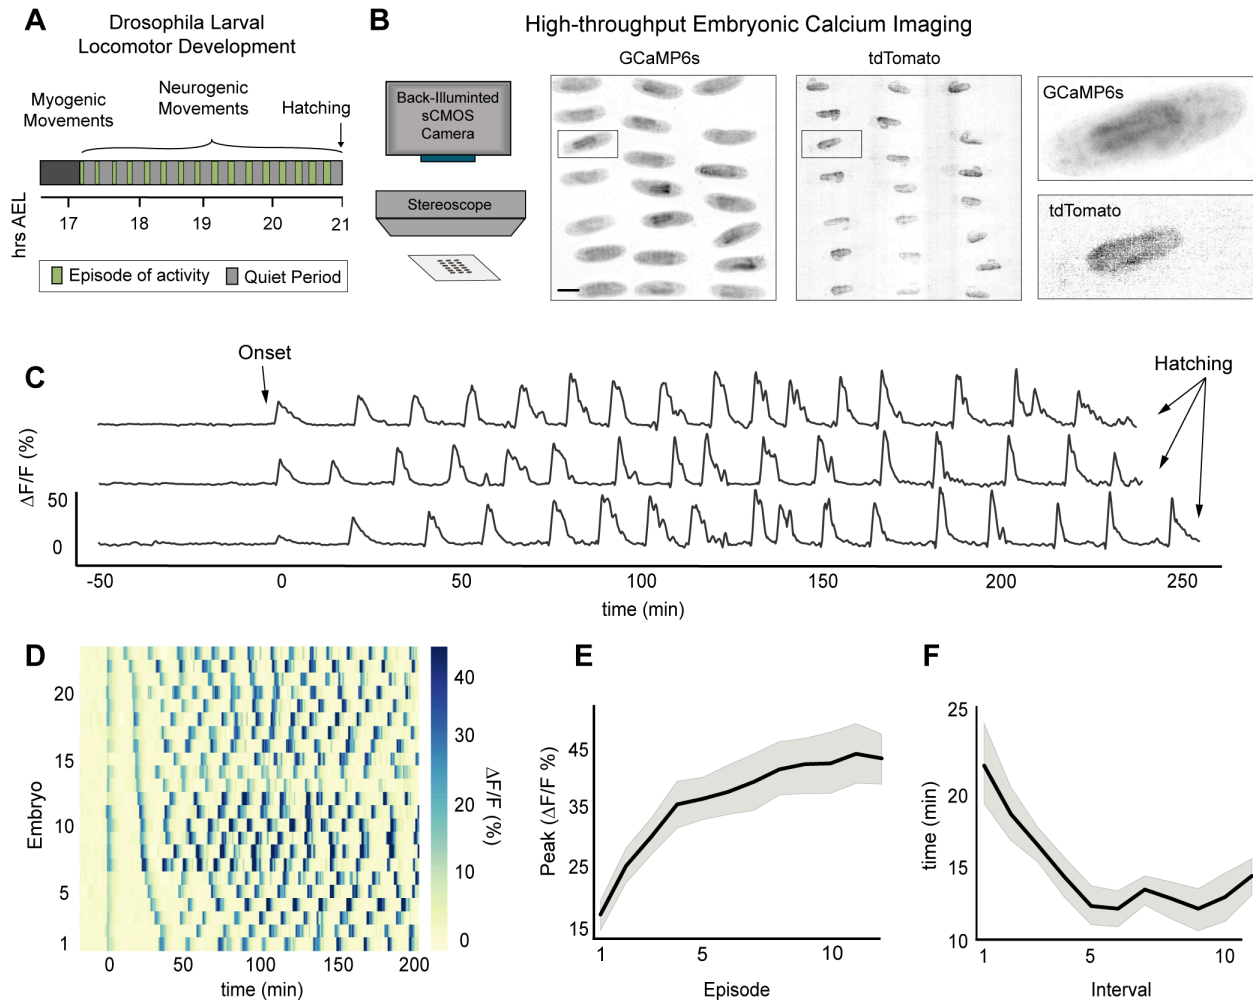

## Figure 1. Characterization of patterned spontaneous network activity in *Drosophila* embryo

**(A)** Schematic of *Drosophila* larval locomotor development. Time in hours after egg laying (hrsAEL). **(B)** Schematic of high-throughput imaging system to record PaSNA (left). Entire field snapshots of GCaMP6s and tdTomato signal, inverted for visualization (right). Scale bar is 200  $\mu\text{m}$ . **(C)** GCaMP6s::tdTomato  $\Delta F/F$  traces from three individual embryos. **(D)** Raster plot for PaSNA trimmed at 200 minutes post-onset sorted by distance between first and second peak, each row corresponding to an individual embryo. Note that increasingly strong embryo movements prevent accurate measurements past this point.  $\Delta F/F$  heat map scale to the right. **(E)**  $\Delta F/F$  peaks for episodes 1 through 12 ( $n = 23$ ). **(F)** Interbout interval length until episode 12 ( $n = 23$ ). For E and F, dark lines represent mean and shades depict the 95% CI. For genotype information see Table S1.

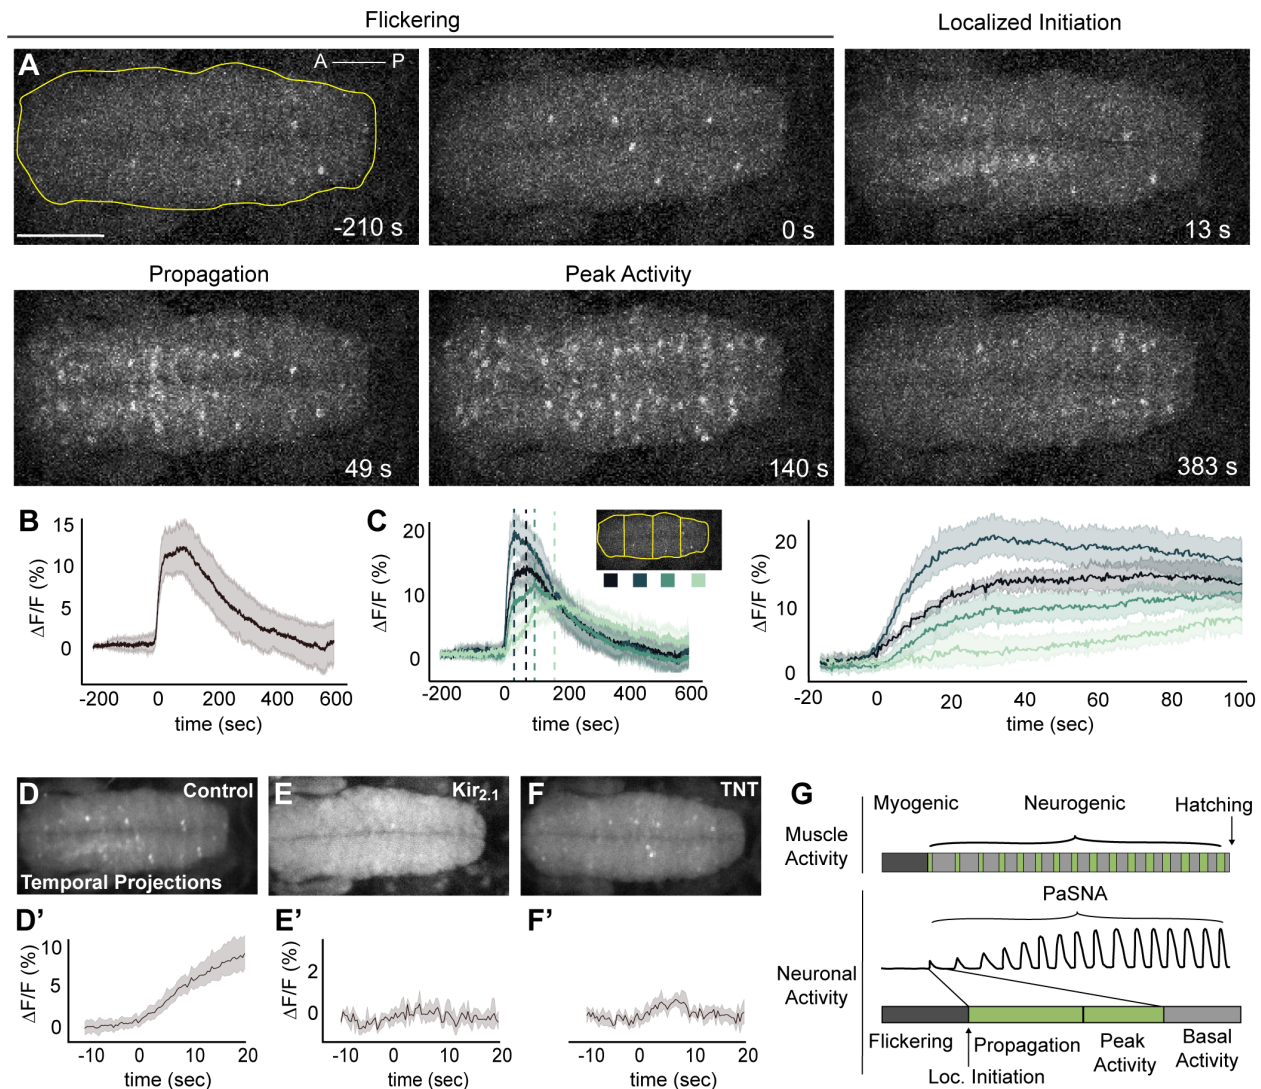

## Figure 2. Spatiotemporal and network properties of a single PaSNA episode

**(A)** Snapshots throughout the first episode of PaSNA in a representative embryo. Stages of the episode labeled on top. Images are two-photon maximum intensity projections from an embryonic VNC expressing pan-neuronal GCaMP6s. Time stamps are relative to the positive inflection point caused by the activity burst. Yellow line delineates the VNC and ROI used for Panel B. Scale bar is 50  $\mu\text{m}$ . **(B)**  $\Delta F/F$  trace of the entire VNC during the first episode of PaSNA ( $n = 8$ ). **(C)**  $\Delta F/F$  of the color-coded four ROIs. Left shows from -200 seconds to 600 seconds and right from -20 to 100 seconds relative to the initiation of PaSNA. **(D-F')** Temporal projections (top) and  $\Delta F/F$  VNC traces (bottom) for 30 seconds near the localized initiation time of the episode for control embryos ( $n = 8$ ) (D), embryos expressing Kir<sub>2.1</sub> pan-neuronally (E) ( $n = 5$ ) and embryos

expressing TNT pan-neuronally (F) (n = 6). **(G)** Schematic of *Drosophila* larval locomotor development showing activity at the muscle (top) and neuronal level (bottom). For all the time series, dark lines represent the mean, and shades depict the 95% confidence interval. For genotype information see Table S1.

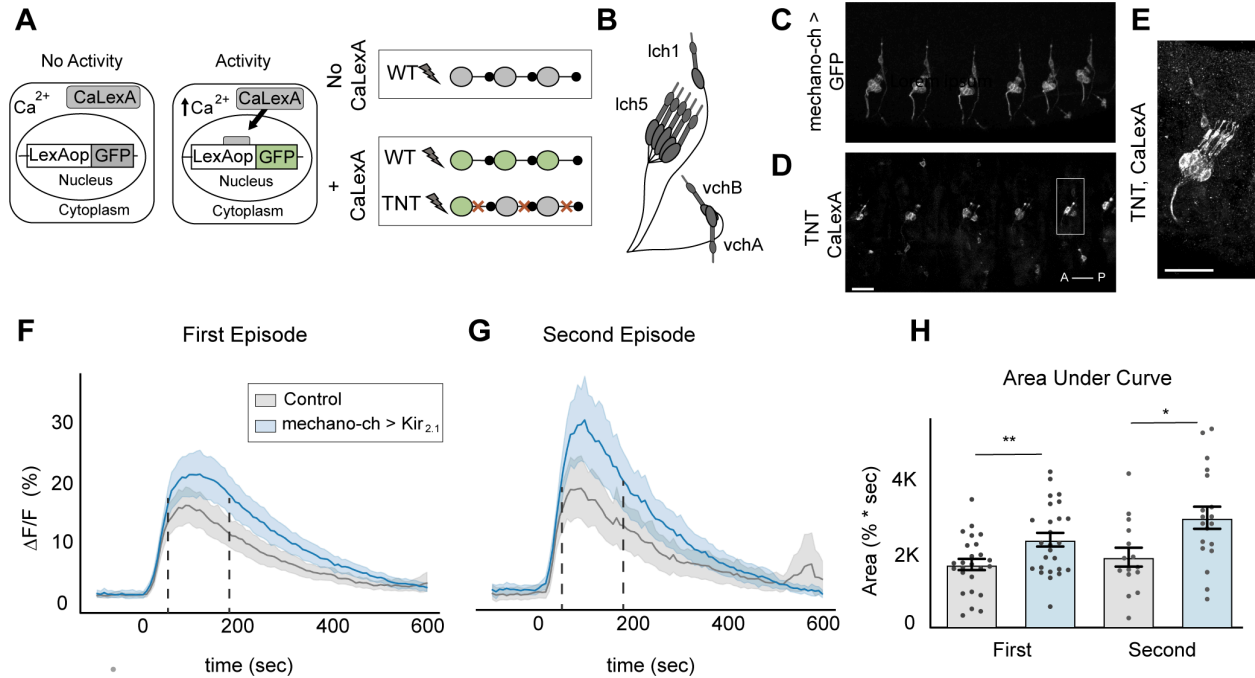

**Figure 3. Mechanosensory neurons modulate the amplitude of PaSNA episodes**

**(A)** Experiment to reveal sensory neurons active during myogenic phase. **(B)** Schematic of *Drosophila* mechanosensory chordotonal (mechano-ch) sensory neurons. **(C)** Expression pattern of mechano-ch driver *inactive (iav)* along several body wall segments in embryo for comparison. **(D-E)** GFP signal from a 19 hrsAEL embryo expressing pan-neuronal TNT and CaLexA. Scale bars are 20 $\mu$ m. **(F-G)**  $\Delta F/F$  traces for the first episode (n = 25 control; 25 experimental) (F) or second episode (n = 15 control; 16 experimental) (G). Control data are depicted in gray and experimental data from embryos with Kir<sub>2.1</sub> expression in mechano-ch neurons are depicted in blue. Intermittent lines delineate the time lapse used for quantifications in (H). **(H)** Area under the curve quantification for first (n = 25, control and 26 experimental) and second episode (n = 15, control and 19 experimental). For time series, dark lines represent the mean and shades depict the 95% confidence interval. Bar plots represent mean with  $\pm$  SEM. \* p < 0.05, \*\* p < 0.005; two-sample t test. For genotype information see Table S1.

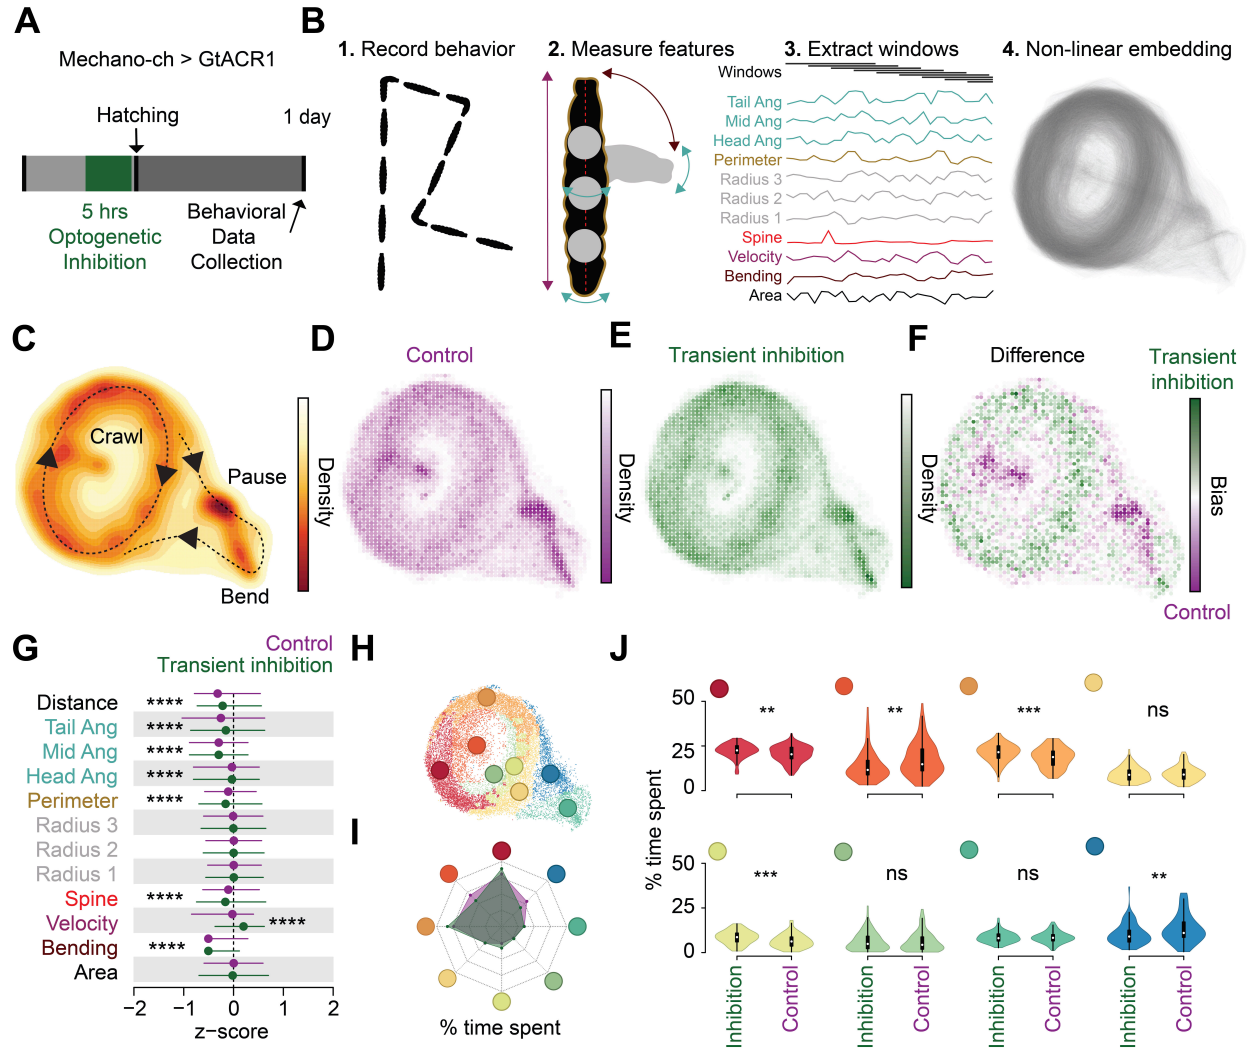

## Figure 4. Temporal embryonic inhibition of mechanosensory input leads to abnormal larval behavior

**(A)** Schematic of experimental design. **(B)** Workflow for Time Resolved Behavioral Embedding (TREBLE) (Methods). **(C)** Probability density function of larval locomotor space plotted as a heatmap. Behaviors annotated qualitatively. Density scale to the right. **(D-E)** Bin-wise occurrence distributions for control (n = 84) (D) and transient inhibition (n = 97) (E) groups. **(F)** Difference map between control (purple) and transiently inhibited (green) animals. Bias scale to the right. **(G)** Comparison of primary behavioral features between control (purple) and transiently inhibited (green) larvae. **(H)** Behavioral space colored via Louvain clusters (Methods). **(I)** Radar chart comparing the percentage of time spent in each of the Louvain clusters for control (purple shade) and transient inhibition (green shade) groups. **(J)** Differences in occurrence in each

behavioral cluster between control and transiently inhibited animals. For G \*\*\*\*  $p < 0.0001$ ; trial-wise Kruskal-Wallis test, Bonferroni correction. For J \*\*\*  $p < 0.001$ , \*\*  $p < 0.01$ ; trial-wise Kruskal-Wallis test. For genotype information see Table S1.

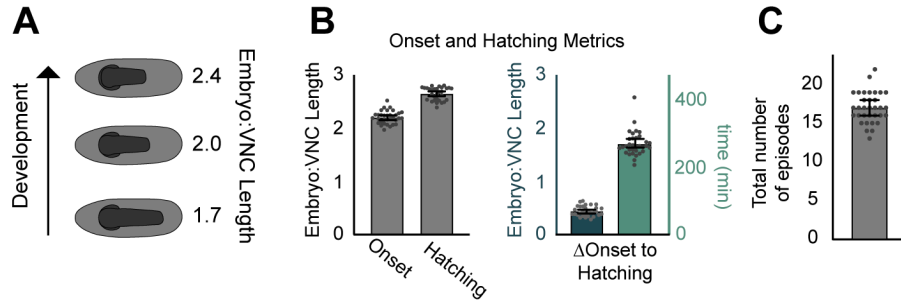

**Figure S1 related to Figure 1. Onset and length of PaSNA quantification.**

**(A)** Developmental metric used to quantify PaSNA progression. **(B)** Onset and hatching measurements of PaSNA ( $n = 33$ ). **(C)** Number of total episodes from PaSNA onset to hatching ( $n = 33$ ). Bar plots represent mean with 95% confidence interval.

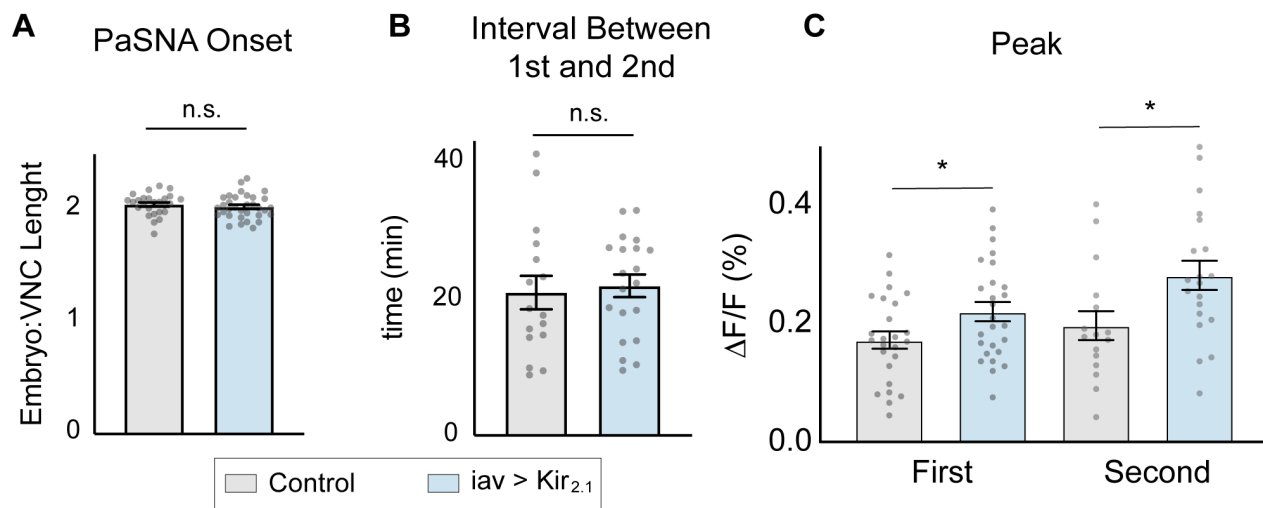

**Figure S2 related to Figure 3. PaSNA onset, interbout interval and amplitude peak in the absence of mechano-ch input**

**(A)** Quantification of PaSNA onset ( $n = 26$  control;  $33$  experimental). Control embryos (gray) and experimental embryos expressing Kir2.1 in mechano-ch neurons (blue). **(B)** Quantification of interval between first and second episode ( $n = 16$  control;  $20$  experimental). **(C)** Peak quantification for first ( $n = 25$ , control and  $26$  experimental) and second episode ( $n = 16$ , control and  $20$  experimental). Bar plots represent mean with  $\pm$  SEM.

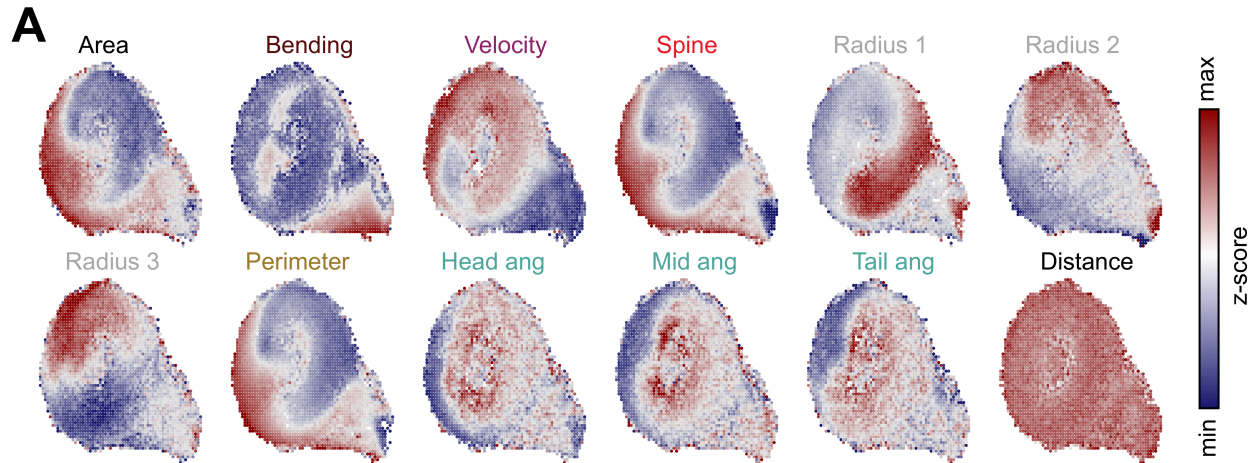

**Figure S3 Primary behavioral metrics as a function of larval behavioral space.**

The distribution of area, bending, velocity, spine length, radius 1, radius 2, radius 3, perimeter, head angle, middle body angle, tail angle, and distance as a function of larval behavior space (z-scores). Z-score scale to the right.

**Video S1A High-throughput wide-field calcium imaging.** Wide-field pan-neuronal GCaMP6s signal from 21 embryos throughout PaSNA. 750 times real time speed. Scale bar is 200 $\mu$ m and the timestamp is in minutes:seconds.

**Video S1B High-throughput wide-field calcium imaging.** Pan-neuronal GCaMP6s (top) and tdTomato (bottom) signals of an individual embryo throughout PaSNA at 750 times real time speed. Scale bar is 100 $\mu$ m and the timestamp is in minutes:seconds.

**Video S2 Two-photon calcium imaging of embryo.** Two-photon pan-neuronal GCaMP6s signal of a representative embryo.

**Video S3 PaSNA depends on depolarizations.** Two-photon pan-neuronal GCaMP6s signal of a single embryo expressing Kir2.1 pan-neuronally.

**Video S4 PaSNA depends on synaptic transmission.** Two-photon pan-neuronal GCaMP6s signal of a single embryo expressing TNT pan-neuronally.



## References

1. Goodman, C.S., and Shatz, C.J. (1993). Developmental mechanisms that generate precise patterns of neuronal connectivity. *Cell* 72, 77–98.
2. Kirkby, L.A., Sack, G.S., Firl, A., and Feller, M.B. (2013). A role for correlated spontaneous activity in the assembly of neural circuits. *Neuron* 80, 1129–1144.
3. Thompson, A., Gribizis, A., Chen, C., and Crair, M.C. (2017). Activity-dependent development of visual receptive fields. *Current Opinion in Neurobiology* 42, 136–143.
4. Peraanu, W., Spindler, S., Im, E., Buu, N., and Hartenstein, V. (2007). The Emergence of Patterned Movement During Late Embryogenesis of *Drosophila*. *Dev Neurobiology*, 1669–1685.
5. Crisp, S., Evers, J.F., Fiala, A., and Bate, M. (2008). The development of motor coordination in *Drosophila* embryos. *Development* 3717, 3707–3717.
6. Crisp, S.J., Evers, J.F., and Bate, M. (2011). Endogenous Patterns of Activity Are Required for the Maturation of a Motor Network. *J. Neurosci* 31, 10445–10450.
7. Campos-Ortega, J.A., and Hartenstein, V. (2013). *The Embryonic Development of Drosophila melanogaster* (Springer Science & Business Media).
8. Olofsson, B., and Page, D.T. (2005). Condensation of the central nervous system in embryonic *Drosophila* is inhibited by blocking hemocyte migration or neural activity. *Dev. Biol.* 279, 233–243.
9. Baines, R.A., Uhler, J.P., Thompson, A., Sweeney, S.T., and Bate, M. (2001). Altered Electrical Properties in *Drosophila* Neurons Developing without Synaptic Transmission. *J. Neurosci.* 21, 1523 LP–1531.
10. Masuyama, K., Zhang, Y., Rao, Y., and Wang, J.W. (2012). Mapping Neural Circuits with Activity-Dependent Nuclear Import of a Transcription Factor. *J. Neurogenet.* 26, 89–102.
11. Hehlert, P., Zhang, W., and Göpfert, M.C. (2020). *Drosophila* Mechanosensory Transduction. *Trends Neurosci.*
12. Mohammad, F., Stewart, J., Ott, S., Chlebkova, K., Chua, J.Y., Koh, T.-W., Ho, J., and Claridge-Chang, A. (2017). Optogenetic inhibition of behavior with anion channelrhodopsins. *Nat. Methods* 14, 271–274.
13. Risse, B., Thomas, S., Otto, N., Löpmeier, T., Valkov, D., Jiang, X., and Klämbt, C. (2013). FIM, a Novel FTIR-Based Imaging Method for High Throughput Locomotion Analysis. *PLoS One* 8.
14. York, R.A., Carreira-Rosario, A., Giocomo, L.M., and Clandinin, T.R. (2021). Flexible analysis of animal behavior via time-resolved manifold embedding. Cold Spring Harbor Laboratory, 2020.09.30.321406.
15. Green, C.H., Burnet, B., and Connolly, K.J. (1983). Organization and patterns of inter- and intraspecific variation in the behaviour of *Drosophila* larvae. *Anim. Behav.* 31, 282–291.

16. Clark, M.Q., McCumsey, S.J., Lopez-Darwin, S., Heckscher, E.S., and Doe, C.Q. (2016). Functional Genetic Screen to Identify Interneurons Governing Behaviorally Distinct Aspects of *Drosophila* Larval Motor Programs. *G3* 6, 2023–2031.
17. Akin, O., Bajar, B.T., Keles, M.F., Frye, M.A., and Zipursky, S.L. (2019). Cell-type-Specific Patterned Stimulus-Independent Neuronal Activity in the *Drosophila* Visual System during Synapse Formation. *Neuron* 101, 894–904.e5.
18. Momose-Sato, Y., and Sato, K. (2013). Large-scale synchronized activity in the embryonic brainstem and spinal cord. *Front. Cell. Neurosci.* 7, 36.
19. Pulver, S.R., Bayley, T.G., Taylor, A.L., Berni, J., Bate, M., and Hedwig, B. (2015). Imaging fictive locomotor patterns in larval *Drosophila*. *J. Neurophysiol.* 114, 2564–2577.
20. Heckscher, E.S., Lockery, S.R., and Doe, C.Q. (2012). Characterization of *Drosophila* larval crawling at the level of organism, segment, and somatic body wall musculature. *J. Neurosci.* 32, 12460–12471.
21. Valdes-Aleman, J., Fetter, R.D., Sales, E.C., Heckman, E.L., Venkatasubramanian, L., Doe, C.Q., Landgraf, M., Cardona, A., and Zlatic, M. (2021). Comparative Connectomics Reveals How Partner Identity, Location, and Activity Specify Synaptic Connectivity in *Drosophila*. *Neuron* 109, 105–122.e7.
22. Caldwell, J.C., Miller, M.M., Wing, S., Soll, D.R., and Eberl, D.F. (2003). Dynamic analysis of larval locomotion in *Drosophila* chordotonal organ mutants. *Proc. Natl. Acad. Sci. U. S. A.* 100, 16053–16058.
23. Fushiki, A., Kohsaka, H., and Nose, A. (2013). Role of Sensory Experience in Functional Development of *Drosophila* Motor Circuits. *PLoS One* 8, 1–10.
24. Cheng, L.E., Song, W., Looger, L.L., Jan, L.Y., and Jan, Y.N. (2010). The role of the TRP channel NompC in *Drosophila* larval and adult locomotion. *Neuron* 67, 373–380.
25. Makino, H., Hwang, E.J., Hedrick, N.G., and Komiyama, T. (2016). Circuit Mechanisms of Sensorimotor Learning. *Neuron* 92, 705–721.
26. Shearin, H.K., Dvarishkis, A.R., Kozeluh, C.D., and Stowers, R.S. (2013). Expansion of the gateway multisite recombination cloning toolkit. *PLoS One* 8, e77724.
27. Manning, L., and Doe, C.Q. (2017). Immunofluorescent antibody staining of intact *Drosophila* larvae. *Nat. Protoc.* 12, 1–14.
28. Risse, B., Berh, D., Otto, N., Klämbt, C., and Jiang, X. (2017). FIMTrack: An open source tracking and locomotion analysis software for small animals. *PLoS Comput. Biol.* 13.
29. Risse, B., Otto, N., Berh, D., Jiang, X., and Klämbt, C. (2014). FIM imaging and FIMtrack: Two new tools allowing high-throughput and cost effective locomotion analysis. *J. Vis. Exp.*
30. McInnes, L., Healy, J., and Melville, J. (2018). UMAP: Uniform Manifold Approximation and Projection for Dimension Reduction. *arXiv [stat.ML]*.
31. Csardi, G., Nepusz, T., and Others (2006). The igraph software package for complex network research. *InterJournal, complex systems* 1695, 1–9.
